# Supplementary material
Source: MDPI journal article supplement (https://www.mdpi.com/1999-4907/14/12/2407)
Supplement: s1 [file s1]

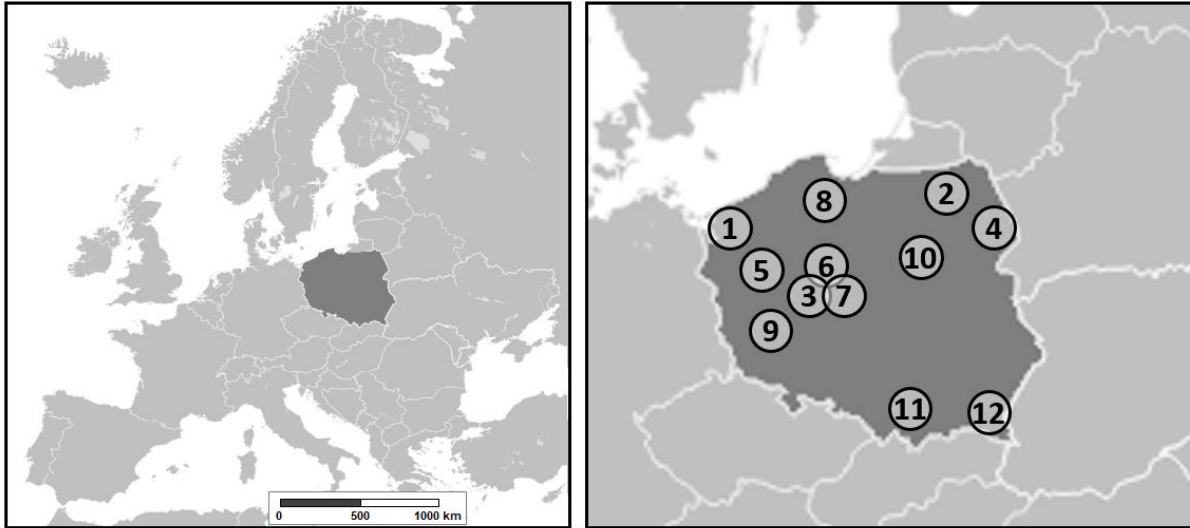

**Figure S1.** The study stands gathered in 12 regions distributed across the country.

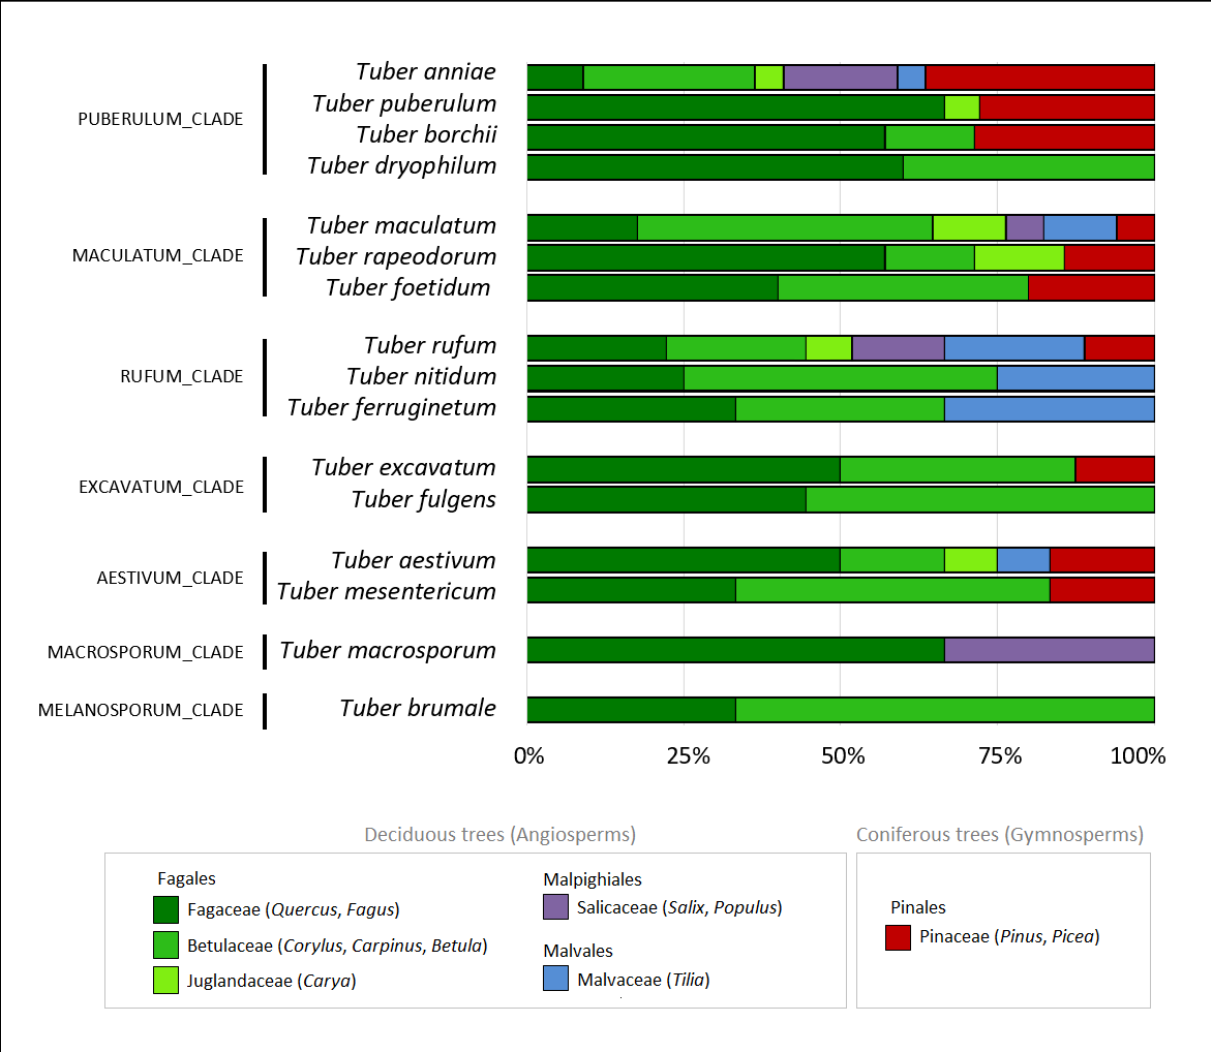

**Figure S2.** Percentage share of ectomycorrhizal associations formed by truffle species of the seven phylogenetic lineages (clades) according to the identity of their tree partners.
